# Supplementary material
Source: Springer Nature journal article supplement (https://www.springermedizin.de/resource/supplementary/12865_2007_148_MOESM2_ESM.pdf/9428672)

## Autosomal recessive CVID families

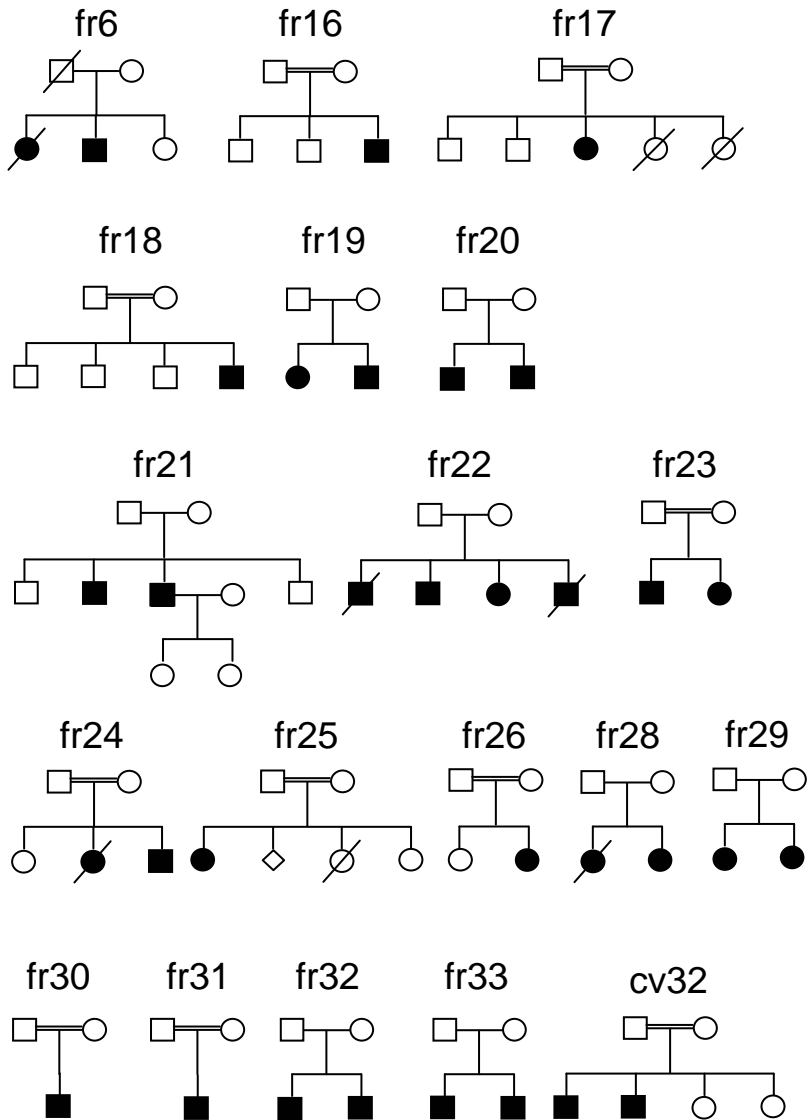

## „linked“ CVID families

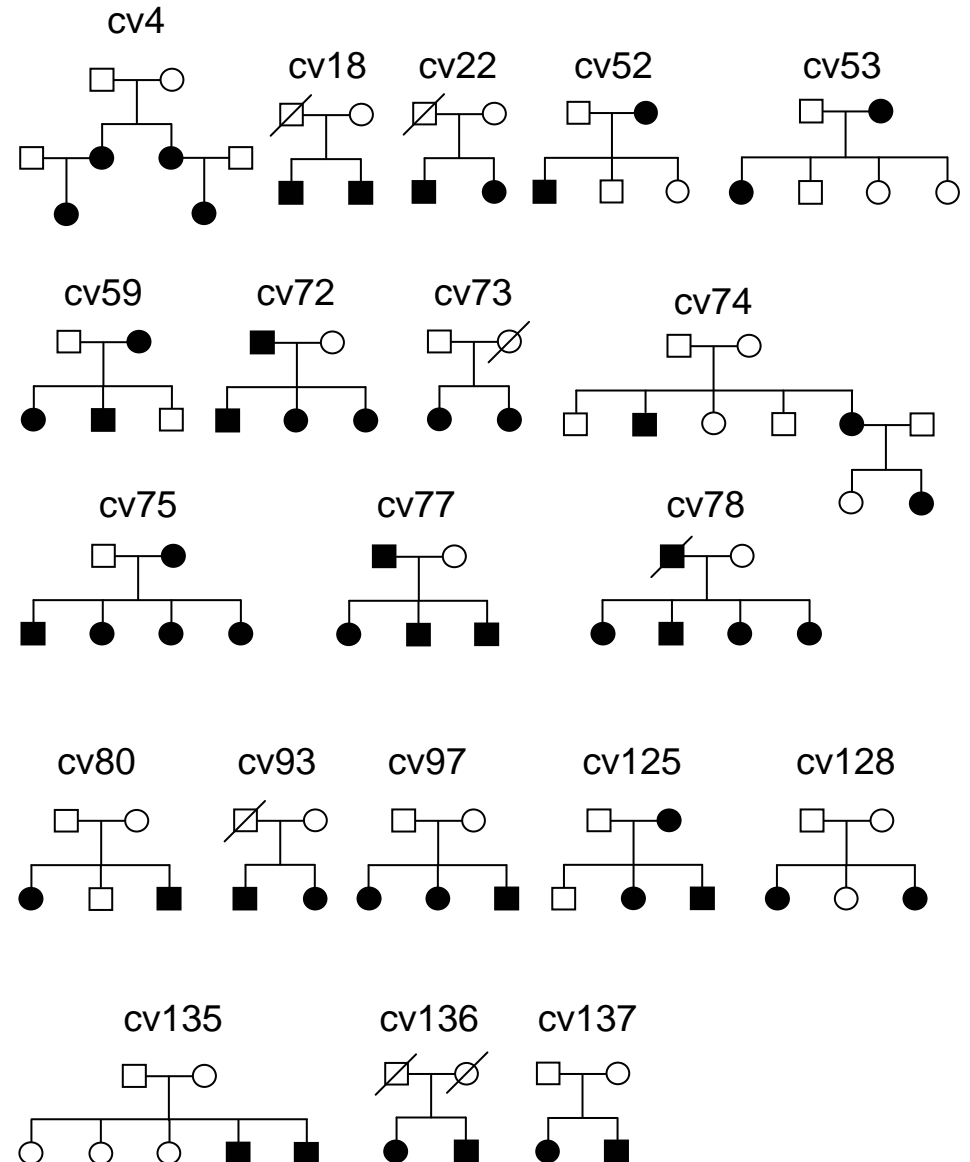

Supplement: MOESM2 [file 9428672]
